# Supplementary material for: Long‐term musical training induces white matter plasticity in emotion and language networks
Source: PubMed Central journal article supplement — Hum Brain Mapp. 2022 Aug 25;44(1):5–17. doi: 10.1002/hbm.26054 (PMC9783470; doi:10.1002/hbm.26054), 2022-08-25
Supplement: HBM-44-5-s002.pdf [file HBM-44-5-s002.pdf]

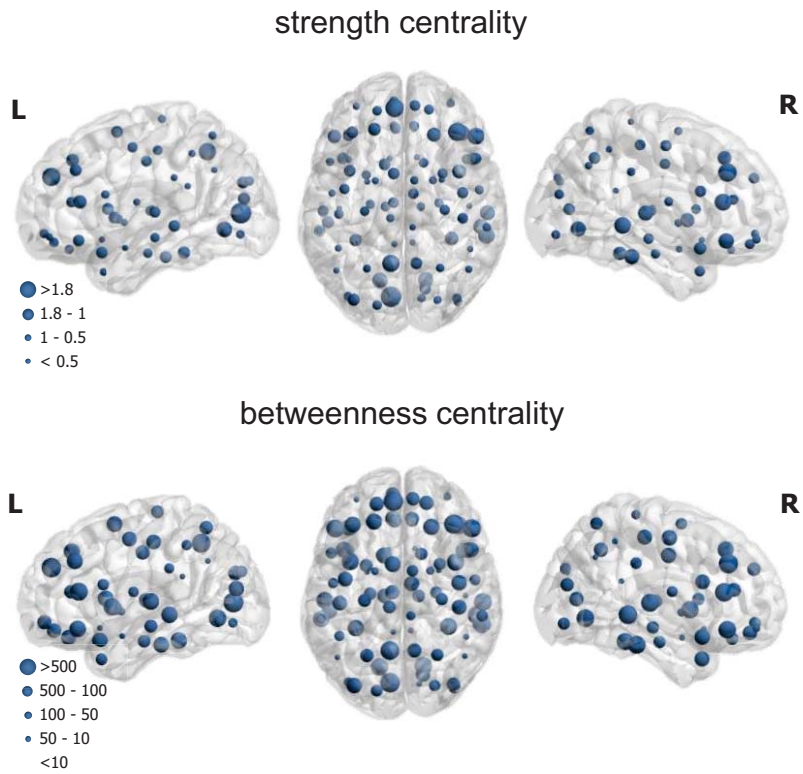

**Figure s2.** Illustration of strength centrality and betweenness centrality.

Note that the size of the spheres represents the mean score of the three groups. L, left hemisphere; R, right hemisphere.
