# Supplementary material for: Long‐term musical training induces white matter plasticity in emotion and language networks
Source: PubMed Central journal article supplement — Hum Brain Mapp. 2022 Aug 25;44(1):5–17. doi: 10.1002/hbm.26054 (PMC9783470; doi:10.1002/hbm.26054), 2022-08-25
Supplement: HBM-44-5-s003.pdf [file HBM-44-5-s003.pdf]

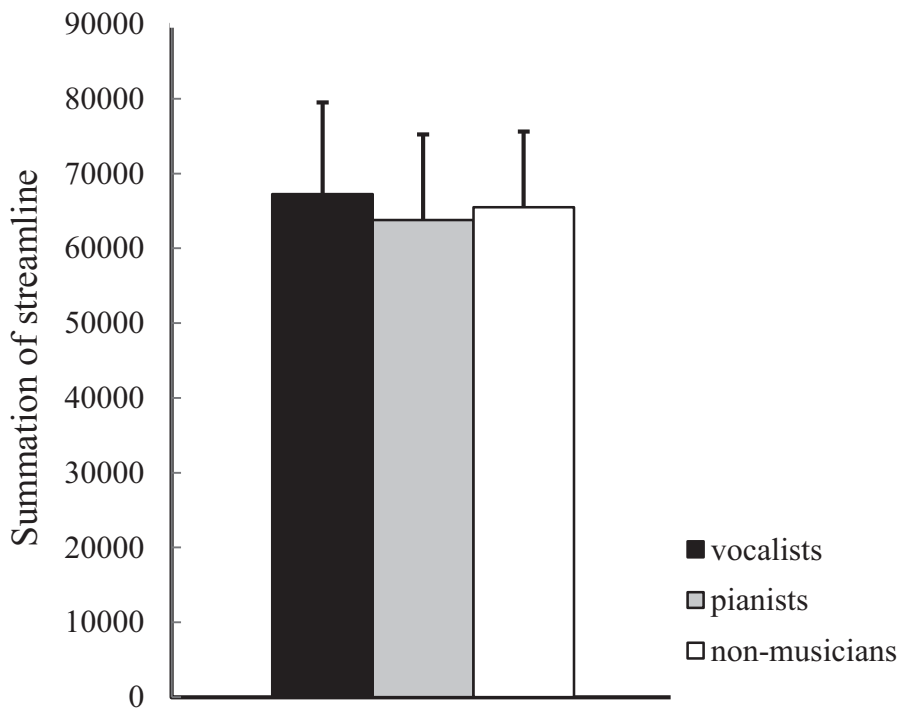

**Figure s1.** No significant difference was found in the number of whole-brain streamlines among the three groups. ( $H(2)=1.08$ ,  $p = 0.583$  for one-way Kruskal-Wallis test)
