# Supplementary material for: Long‐term musical training induces white matter plasticity in emotion and language networks
Source: PubMed Central journal article supplement — Hum Brain Mapp. 2022 Aug 25;44(1):5–17. doi: 10.1002/hbm.26054 (PMC9783470; doi:10.1002/hbm.26054), 2022-08-25
Supplement: HBM-44-5-s004.pdf [file HBM-44-5-s004.pdf]

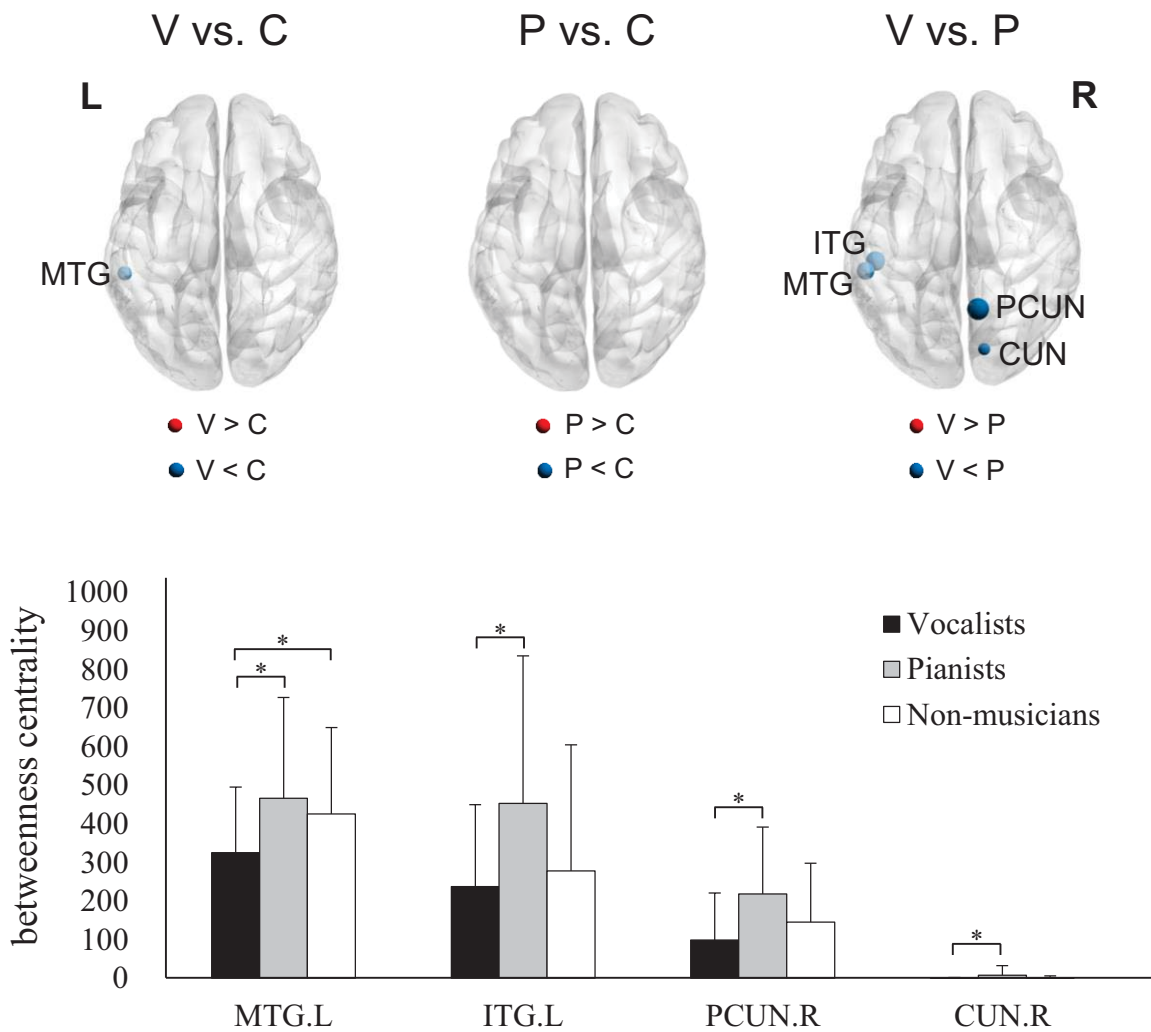

**Figure s3.** Comparison of betweenness centrality among the three groups.

Note that the size of the sphere indicates the degree of statistical significance between the results from the two groups. The Kruskal-Wallis tests revealed significant group differences in the left middle temporal gyrus (MTG;  $H(2)=6.553$ ,  $p=0.038$ ), left inferior temporal gyrus (ITG;  $H(2)=9.273$ ,  $p=0.010$ ), right precuneus (PCUN;  $H(2)=7.816$ ,  $p=0.020$ ), right cuneus (CUN;  $H(2)=6.788$ ,  $p=0.034$ ). P, pianists; V, vocalists; C, non-musicians; L, left; R, right. (\* FWE-corrected  $p < 0.05$ , *post hoc* permutation test using 10,000 iterations)
